# Supplementary material for: Factors facilitating a national quality registry to aid clinical quality improvement: findings of a national survey
Source: PubMed Central journal article supplement — BMJ Open. 2016 Nov 9;6(11):e011562. doi: 10.1136/bmjopen-2016-011562 (PMC5128910; doi:10.1136/bmjopen-2016-011562), 2016-11-09
Supplement: bmjopen-2016-011562supp1.pdf [file bmjopen-2016-011562supp1.pdf]

## I. Overview of the KVAK web survey content and structure (English version)

| <b>Section A. Background</b>                                  |                                                                                                                 |                                                                                  |
|---------------------------------------------------------------|-----------------------------------------------------------------------------------------------------------------|----------------------------------------------------------------------------------|
| <b>Item number</b>                                            | <b>Items</b>                                                                                                    |                                                                                  |
| 1-5                                                           | My: sex, age, professional role, role in the local work with the registry, and number of years in registry role |                                                                                  |
| <b>Section B. Quality of care and access to resources</b>     |                                                                                                                 |                                                                                  |
| <b>Item number</b>                                            | <b>Items</b>                                                                                                    | <b>Response alternatives</b>                                                     |
| 6-7                                                           | Quality of Stroke Care                                                                                          | Likert scale, five alternatives ranging from Strongly Disagree to Strongly Agree |
| 8                                                             | Quality of Local Data                                                                                           | Likert scale, five alternatives ranging from Very Poor to Very Good              |
| <b>Section C. Data from the quality registry</b>              |                                                                                                                 |                                                                                  |
| <b>Item number</b>                                            | <b>Items</b>                                                                                                    | <b>Response alternatives</b>                                                     |
| 9-13                                                          | Riksstroke data                                                                                                 | Likert scale, five alternatives ranging from Strongly Disagree to Strongly Agree |
| <b>Section D. Organisational conditions for registry work</b> |                                                                                                                 |                                                                                  |
| <b>Item number</b>                                            | <b>Items</b>                                                                                                    | <b>Response alternatives</b>                                                     |

|                                           |                                                                   |                                                                                  |
|-------------------------------------------|-------------------------------------------------------------------|----------------------------------------------------------------------------------|
| 14-16                                     | Resources for entry and analysis of data and quality improvements | Likert scale, five alternatives ranging from Strongly Disagree to Strongly Agree |
| 17-19                                     | Managers' support                                                 | Likert scale, five alternatives ranging from Strongly Disagree to Strongly Agree |
| 20-23                                     | Where I turn for support                                          | Five alternatives, at department, hospital, regional and national level          |
| 24-28                                     | Support received                                                  | Likert scale, five alternatives ranging from Strongly Disagree to Strongly Agree |
| <b>Section E. My use of registry data</b> |                                                                   |                                                                                  |
| <b>Item number</b>                        | <b>Items</b>                                                      | <b>Response alternatives</b>                                                     |
| 29-30                                     | Simplicity in retrieving and reporting data/output                | Likert scale, five alternatives ranging from Strongly Disagree to Strongly Agree |
| 31                                        | Motivation                                                        | Likert scale, five alternatives ranging from Strongly Disagree to Strongly Agree |

|                                                           |                                                                                                               |                                                                                  |
|-----------------------------------------------------------|---------------------------------------------------------------------------------------------------------------|----------------------------------------------------------------------------------|
| 32-37                                                     | My role in the data management process (from entering data, to analysis, and stroke care quality improvement) | Likert scale, four alternatives ranging from Never to Often                      |
| <b>Section F. The organisation's use of registry data</b> |                                                                                                               |                                                                                  |
| <b>Item number</b>                                        | <b>Items</b>                                                                                                  | <b>Response alternatives</b>                                                     |
| 38-45                                                     | Our use of the Riksstroke data, in general and in quality improvement                                         | Likert scale, five alternatives ranging from Strongly Disagree to Strongly Agree |
| 46-49                                                     | Others' interest in our results in Riksstroke                                                                 | Likert scale, five alternatives ranging from Strongly Disagree to Strongly Agree |
| <b>Section G. Concluding question</b>                     |                                                                                                               |                                                                                  |
| <b>Item number</b>                                        | <b>Item</b>                                                                                                   | <b>Response alternatives</b>                                                     |
| 50                                                        | Efforts in relation to use of Riksstroke                                                                      | Likert scale, five alternatives ranging from Strongly Disagree to Strongly Agree |

The KVAK survey is licensed as a [CC Attribution-NonCommercial \(CC BY-NC\)](#) product.

For further communication and access to the survey, please contact Associate Professor Ulrika Winblad, Uppsala University, Sweden at: [Ulrika.Winblad@pubcare.uu.se](mailto:Ulrika.Winblad@pubcare.uu.se) Further details on the license can be found at <https://creativecommons.org/>
